# Supplementary material for: B cell–intrinsic requirement for WNK1 kinase in antibody responses in mice
Source: PubMed Central journal article supplement (PMC9872328; doi:10.1084/jem.20211827), 2023-01-20

E

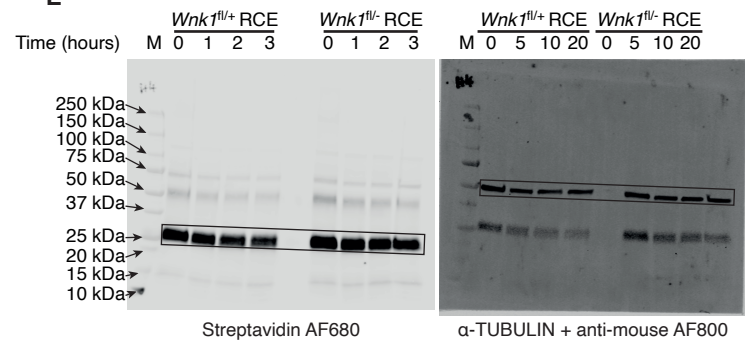

Supplement: JEM_20211827_SourceDataF5.pdf [file JEM_20211827_SourceDataF5.pdf]
